# Supplementary material for: Impact of a commercial order entry system on prescribing errors amenable to computerised decision support in the hospital setting: a prospective pre-post study
Source: PubMed Central journal article supplement — BMJ Qual Saf. 2018 Mar 23;27(9):725–36. doi: 10.1136/bmjqs-2017-007135 (PMC6109251; doi:10.1136/bmjqs-2017-007135), 2018-03-23
Supplement: bmjqs-2017-007135supp001.pdf [file bmjqs-2017-007135supp001.pdf]

## **SUPPLEMENTARY APPENDICES**

**Supplementary appendix 1:** High-risk prescribing errors amenable to clinical decision support (13)

**Supplementary appendix 2:** Scoring likelihood and severity of the errors occurring (from the UK National Patient Safety Agency Risk Matrix)

**Supplementary appendix 3:** Summary of the opportunities for error and high-risk errors occurring across all sites pre- and post-CPOE

**Supplementary appendix 4:** Clinical decision support configured at each site for each of the 78 errors

**Supplementary appendix 5:** Errors occurring pre-implementation and post-implementation considering the level of decision support

**Supplementary appendix 1: High-risk prescribing errors amenable to clinical decision support (13)**

| <b>Prescribing Error</b>                                                                                                                                                                                                                                                      | <b>Error Type</b>         |
|-------------------------------------------------------------------------------------------------------------------------------------------------------------------------------------------------------------------------------------------------------------------------------|---------------------------|
| Penicillin containing compound prescribed to a penicillin allergic patient without reasoning (e.g. a mild or non-allergy such as diarrhoea or vomiting entered as an allergy where the indication for penicillin is compelling) ( <i>Risk of hypersensitivity reactions</i> ) | Allergy                   |
| Amiodarone prescribed to a patient with abnormal thyroid function tests ( <i>Increased risk of thyroid disorders</i> )                                                                                                                                                        | Clinical contraindication |
| Non-cardioselective beta-adrenoceptor blocking drug prescribed to a patient with chronic obstructive pulmonary disease ( <i>Increased risk of bronchospasm</i> )                                                                                                              | Clinical contraindication |
| ACE inhibitor or angiotensin-II receptor antagonist prescribed to a patient with a potassium level $\geq 5.0$ mmol/litre ( <i>Can cause or exacerbate hyperkalaemia</i> )                                                                                                     | Clinical contraindication |
| Verapamil prescribed to a patient with NYHA Class III or IV heart failure ( <i>Risk of precipitating heart failure, exacerbating conduction disorders and causing significant deterioration</i> )                                                                             | Clinical contraindication |
| Warfarin prescribed to a patient with a concurrent bleeding disorder ( <i>Increased risk of bleeding</i> )                                                                                                                                                                    | Clinical contraindication |
| Aspirin prescribed to a patient with a past medical history of peptic ulcer disease without anti-secretory drugs or mucosal protectants ( <i>Increased risk of peptic ulceration, and risk of bleeding</i> )                                                                  | Clinical contraindication |
| Antiplatelet prescribed to a patient with a concurrent bleeding disorder ( <i>Increased risk of bleeding</i> )                                                                                                                                                                | Clinical contraindication |
| Benzodiazepine or benzodiazepine-like drug prescribed to a patient with chronic obstructive pulmonary disease ( <i>Risk of respiratory depression</i> )                                                                                                                       | Clinical contraindication |
| Antipsychotic, other than risperidone, prescribed to a patient for the management of the behavioural and psychological symptoms of dementia ( <i>Increased risk of stroke</i> )                                                                                               | Clinical contraindication |
| Tricyclic antidepressant prescribed to a patient with dementia ( <i>Increased risk of worsening cognitive impairment</i> )                                                                                                                                                    | Clinical contraindication |
| Selective serotonin re-uptake inhibitor prescribed to a patient with epilepsy ( <i>Increased risk of seizure threshold being reduced</i> )                                                                                                                                    | Clinical contraindication |
| Selective serotonin re-uptake inhibitor prescribed to a patient with a history of clinically significant hyponatraemia (non-iatrogenic, sodium $< 130$ mmol/litre in the previous 2 months) ( <i>Increased risk of hyponatraemia</i> )                                        | Clinical contraindication |
| Prochlorperazine prescribed to a patient with parkinsonism ( <i>Risk of exacerbating parkinsonism symptoms</i> )                                                                                                                                                              | Clinical contraindication |
| NSAID prescribed to a patient with chronic renal failure ( <i>Increased risk of deteriorating renal function</i> )                                                                                                                                                            | Clinical contraindication |
| NSAID prescribed to a patient with a history of peptic ulcer disease or gastrointestinal bleeding without anti-secretory drugs or mucosal protectants ( <i>Increased risk of peptic ulceration and bleeding</i> )                                                             | Clinical contraindication |
| NSAID prescribed to a patient with a history of heart failure ( <i>Risk of exacerbation of heart failure</i> )                                                                                                                                                                | Clinical contraindication |
| Glibenclamide prescribed to an older adult with Type 2 diabetes mellitus ( <i>Increased risk of hypoglycaemia</i> )                                                                                                                                                           | Clinical contraindication |

|                                                                                                                                                                                                                                                                           |                           |
|---------------------------------------------------------------------------------------------------------------------------------------------------------------------------------------------------------------------------------------------------------------------------|---------------------------|
| Metformin prescribed to a patient with eGFR < 30 ml/min/1.73m <sup>2</sup> ( <i>Increased risk of lactic acidosis</i> )                                                                                                                                                   | Clinical contraindication |
| Pioglitazone prescribed to a patient with heart failure ( <i>Risk of exacerbation of heart failure</i> ) <sup>†</sup>                                                                                                                                                     | Clinical contraindication |
| Diphenoxylate, loperamide, codeine phosphate prescribed as antidiarrhoeal agents for treatment of severe infective gastroenteritis (e.g. bloody diarrhoea, high fever, or severe systemic toxicity) ( <i>Increased risk of exacerbation or protraction of infection</i> ) | Clinical contraindication |
| Metoclopramide prescribed to a patient with parkinsonism ( <i>Risk of exacerbating parkinsonism symptoms</i> )                                                                                                                                                            | Clinical contraindication |
| Cephalosporin antibiotic prescribed to an older adult (except under the direction of Microbiology or for suspected meningitis) ( <i>Increased risk of antibiotic-associated infections</i> )                                                                              | Clinical contraindication |
| Vancomycin prescribed intravenously to a patient with renal impairment without dose adjustment ( <i>Increased risk of toxicity</i> )                                                                                                                                      | Clinical contraindication |
| Quinolone antibiotic prescribed to a patient with epilepsy ( <i>Increased risk of seizure threshold being reduced</i> )                                                                                                                                                   | Clinical contraindication |
| Nitrofurantoin prescribed to a patient with eGFR < 60 ml/minute/1.73m <sup>2</sup> ( <i>Risk of peripheral neuropathy and inadequate concentration in urine</i> ) <sup>†</sup>                                                                                            | Clinical contraindication |
| Methotrexate prescribed to a patient with a clinically significant drop in white cell count or platelet count ( <i>Risk of bone marrow suppression</i> )                                                                                                                  | Clinical contraindication |
| Methotrexate prescribed to a patient with abnormal liver function tests ( <i>Risk of liver toxicity</i> )                                                                                                                                                                 | Clinical contraindication |
| Potassium chloride supplements continued for longer than is required (reference range 3.5–5.3 mmol/litre) ( <i>Increased risk of hyperkalaemia</i> )                                                                                                                      | Clinical contraindication |
| Low molecular weight heparin prescribed without the patient's weight being used to calculate the treatment dose ( <i>Risk of subtherapeutic or supratherapeutic dosing</i> )                                                                                              | Dosing                    |
| Low molecular weight heparin prescribed at a dose exceeding the maximum as stated in the product literature ( <i>Risk of bleeding increased</i> )                                                                                                                         | Dosing                    |
| Digoxin prescribed at a dose >125 micrograms daily to a patient with renal impairment ( <i>Increased risk of digoxin toxicity</i> )                                                                                                                                       | Dosing                    |
| Digoxin prescribed at a dose of >125 micrograms daily to a patient with heart failure who is in sinus rhythm ( <i>Increased risk of digoxin toxicity</i> )                                                                                                                | Dosing                    |
| Low molecular weight heparin prescribed to a patient with renal impairment without dose adjustment ( <i>Increased risk of bleeding</i> )                                                                                                                                  | Dosing                    |
| Lithium dose not adjusted or omitted in a patient with a lithium concentration above the therapeutic range (> 1.0 mmol/litre) ( <i>Risk of lithium toxicity</i> )                                                                                                         | Dosing                    |
| Paracetamol prescribed at a dose of 4 g over a 24 hour to a patient under 50 kg ( <i>Risk of hepatocellular toxicity</i> ) <sup>†</sup>                                                                                                                                   | Dosing                    |
| Domperidone prescribed at a total daily dose exceeding 30 mg/day in adults > 60 years old ( <i>Increased risk of QTc prolongation, serious ventricular arrhythmia and sudden cardiac death</i> ) <sup>†</sup>                                                             | Dosing                    |
| Gentamicin dose calculated based on actual body weight rather than ideal body weight in an obese patient (BMI > 30 kg/m <sup>2</sup> ) ( <i>Risk of excessive dosing and toxicity</i> )                                                                                   | Dosing                    |
| Gentamicin prescribed to a patient with renal impairment without dose adjustment ( <i>Increased risk of toxicity</i> )                                                                                                                                                    | Dosing                    |

|                                                                                                                                                                                                                      |                       |
|----------------------------------------------------------------------------------------------------------------------------------------------------------------------------------------------------------------------|-----------------------|
| Gentamicin prescribed to an adult patient with normal renal function in a dose exceeding 7 mg/kg/day ( <i>Increased risk of toxicity</i> )                                                                           | Dosing                |
| Amphotericin B prescribed without stating the brand name and the dose in mg/kg ( <i>Risk of fatal overdose due to confusion between lipid based and non-lipid formulations</i> )                                     | Drug name             |
| Brand specific prescribing of tacrolimus preparations ( <i>Brands vary in their dosing and pharmacokinetics</i> )                                                                                                    | Drug name             |
| Digoxin prescribed concomitantly with a diuretic ( <i>Risk of hypokalaemia and subsequent digoxin toxicity</i> )                                                                                                     | Drug-drug interaction |
| Statin prescribed concomitantly with a macrolide antibiotic ( <i>Increased risk of myopathy</i> )                                                                                                                    | Drug-drug interaction |
| Potassium-sparing diuretic (excluding aldosterone antagonists) prescribed to a patient also receiving an ACE inhibitor or angiotensin-II receptor antagonist ( <i>Increased risk of severe hyperkalaemia</i> )       | Drug-drug interaction |
| Amiodarone prescribed concomitantly with simvastatin 40 mg or above ( <i>Increased risk of myopathy</i> )                                                                                                            | Drug-drug interaction |
| Verapamil prescribed to a patient concomitantly with a beta-adrenoceptor blocking drug ( <i>Increased risk of adverse cardiovascular effects</i> )                                                                   | Drug-drug interaction |
| Warfarin prescribed concomitantly with a NSAID ( <i>Increased risk of bleeding</i> )                                                                                                                                 | Drug-drug interaction |
| Clopidogrel prescribed to a patient concomitantly with a NSAID ( <i>Increased risk of bleeding</i> )                                                                                                                 | Drug-drug interaction |
| Clopidogrel prescribed to a patient concomitantly with omeprazole or esomeprazole ( <i>Antiplatelet effect of clopidogrel potentially reduced</i> ) <sup>†</sup>                                                     | Drug-drug interaction |
| Macrolide antibiotic prescribed concomitantly with warfarin without appropriate dose adjustment or increased INR monitoring ( <i>Increased risk of bleeding</i> )                                                    | Drug-drug interaction |
| Lithium prescribed in conjunction with newly prescribed NSAIDs without dose adjustment or increased monitoring ( <i>Increased risk of toxicity</i> ) <sup>†</sup>                                                    | Drug-drug interaction |
| Lithium therapy prescribed in conjunction with newly prescribed loop or thiazide diuretics without dose adjustment or increased monitoring ( <i>Increased risk of toxicity</i> ) <sup>†</sup>                        | Drug-drug interaction |
| Tricyclic antidepressant prescribed at the same time as a Monoamine Oxidase Inhibitor ( <i>Increased risk of serotonin syndrome</i> )                                                                                | Drug-drug interaction |
| Tramadol prescribed concomitantly with a Monoamine Oxidase Inhibitor ( <i>Increased risk of serotonin syndrome</i> )                                                                                                 | Drug-drug interaction |
| Selective serotonin re-uptake inhibitor prescribed concomitantly with tramadol ( <i>Increased risk of serotonin syndrome</i> )                                                                                       | Drug-drug interaction |
| Selective serotonin re-uptake inhibitor prescribed concomitantly with aspirin without appropriate prophylaxis with anti-secretory drugs or mucosal protectant ( <i>Increased risk of gastrointestinal bleeding</i> ) | Drug-drug interaction |
| Citalopram prescribed concomitantly with other QT prolonging drugs ( <i>Increased risk of arrhythmias</i> ) <sup>†</sup>                                                                                             | Drug-drug interaction |
| Tramadol prescribed concomitantly with antiepileptics ( <i>Increased risk of seizures in patients with uncontrolled epilepsy</i> ) <sup>†</sup>                                                                      | Drug-drug interaction |
| Nefopam prescribed concomitantly with antiepileptics ( <i>Increased risk of seizures in patients with uncontrolled epilepsy</i> ) <sup>†</sup>                                                                       | Drug-drug interaction |

|                                                                                                                                                                                                                |                                    |
|----------------------------------------------------------------------------------------------------------------------------------------------------------------------------------------------------------------|------------------------------------|
| Colestyramine prescribed to a patient at the same time as any other oral medication ( <i>Risk of poor clinical effect owing to reduced absorption of medications</i> ) <sup>†</sup>                            | Drug-drug interaction              |
| Orlistat prescribed at the same time of day as oral antiepileptics ( <i>Orlistat can reduce the absorption of antiepileptics, leading to loss of seizure control</i> )                                         | Drug-drug interaction              |
| Quinolone prescribed to a patient who is also receiving theophylline ( <i>Possible increased risk of convulsions</i> )                                                                                         | Drug-drug interaction              |
| Atazanavir prescribed concomitantly with a proton-pump inhibitor ( <i>Concentration of atazanavir potentially reduced, reducing therapeutic effect</i> )                                                       | Drug-drug interaction              |
| Methotrexate prescribed concomitantly with trimethoprim ( <i>Increased risk of haematological toxicity</i> )                                                                                                   | Drug-drug interaction              |
| Phenytoin and enteral feeds prescribed to a patient concomitantly ( <i>Reduced absorption of phenytoin</i> )                                                                                                   | Drug-food interaction              |
| More than one paracetamol-containing product prescribed to a patient at a time ( <i>Maximum dose exceeded</i> )                                                                                                | Duplicate therapy                  |
| Benzodiazepines prescribed long-term (i.e. more than 2–4 weeks) ( <i>Risk of dependence and withdrawal reactions</i> )                                                                                         | Duration                           |
| Benzodiazepine or benzodiazepine-like drug prescribed long-term to a patient with depression ( <i>Risk of dependence and withdrawal reactions</i> )                                                            | Duration                           |
| Benzodiazepine-like drugs (e.g. zopiclone) prescribed long-term (i.e. more than 2–4 weeks) ( <i>Risk of dependence reactions</i> )                                                                             | Duration                           |
| Antipsychotic prescribed long-term (i.e. > 1 month) to a patient with parkinsonism ( <i>Increased risk of worsening of extra-pyramidal side effects</i> )                                                      | Duration                           |
| Soluble insulin prescribed to a patient on a when required basis ( <i>Increased risk of serious episodes of hypoglycaemia and nocturnal hypoglycaemia post dose</i> ) <sup>†</sup>                             | Frequency                          |
| Weekly dose of an oral bisphosphonate prescribed daily ( <i>Risk of hypocalcaemia</i> ) <sup>†</sup>                                                                                                           | Frequency                          |
| Oral methotrexate prescribed to a patient with an inappropriate frequency ( <i>Increased risk of toxicity</i> )                                                                                                | Frequency                          |
| Diphenoxylate, loperamide, or codeine phosphate prescribed as antidiarrhoeal agents for treatment of diarrhoea of unknown cause ( <i>Increased risk of exacerbating constipation with overflow diarrhoea</i> ) | Indication                         |
| Vancomycin prescribed intravenously over less than 60 minutes ( <i>Rapid infusion of vancomycin can cause severe reactions</i> )                                                                               | Intravenous rate                   |
| Low molecular weight heparin omitted to be prescribed for prophylaxis ( <i>Increased risk of thrombosis</i> )                                                                                                  | Omission of prophylactic treatment |
| Regular opiates prescribed without concurrent use of laxatives ( <i>Risk of severe constipation</i> ) <sup>‡</sup>                                                                                             | Omission of prophylactic treatment |
| Prescribing of incorrect or inequivalent morphine (opiate) dose via multiple routes. ( <i>Risk of toxicity</i> ) <sup>‡</sup>                                                                                  | Route                              |
| Insulin prescribed to a patient at an inappropriate time, allowing for an administration without food (except once daily long-acting insulins) ( <i>Increased risk of hypoglycaemia</i> )                      | Timing of dose                     |

ACE Angiotensin converting enzyme; BMI Body mass index; eGFR Estimated glomerula filtration rate; NSAIDs Non-steroidal anti-inflammatory drugs; NYHA New York Heart Association

**Supplementary appendix 2: Scoring likelihood and severity of the errors occurring (from the UK National Patient Safety Agency Risk Matrix)**

| Consequence                                                                                                 | Likelihood                                      |                                                                             |                                                    |                                             |                                                                             |
|-------------------------------------------------------------------------------------------------------------|-------------------------------------------------|-----------------------------------------------------------------------------|----------------------------------------------------|---------------------------------------------|-----------------------------------------------------------------------------|
|                                                                                                             | 1 Rare<br><i>This will probably never occur</i> | 2 Unlikely<br><i>Do not expect it to occur but it is possible it may do</i> | 3 Possible<br><i>This might occasionally occur</i> | 4 Likely<br><i>This will probably occur</i> | 5 Almost certain<br><i>This will undoubtedly occur, possibly frequently</i> |
| <b>5 Catastrophic</b><br><i>Leads to death, multiple permanent injuries, or irreversible health effects</i> | 5                                               | 10                                                                          | 15                                                 | 20                                          | 25                                                                          |
| <b>4 Major</b><br><i>Major injury leading to long-term incapacity/ disability</i>                           | 4                                               | 8                                                                           | 12                                                 | 16                                          | 20                                                                          |
| <b>3 Moderate</b><br><i>Moderate injury requiring intervention</i>                                          | 3                                               | 6                                                                           | 9                                                  | 12                                          | 15                                                                          |
| <b>2 Minor</b><br><i>Minor injury or illness requiring minor intervention</i>                               | 2                                               | 4                                                                           | 6                                                  | 8                                           | 10                                                                          |
| <b>1 Insignificant</b><br><i>No risk of patient injury or harm and no intervention required</i>             | 1                                               | 2                                                                           | 3                                                  | 4                                           | 5                                                                           |

| Risk Rating Score |                      |                   |                       |
|-------------------|----------------------|-------------------|-----------------------|
| 1-3<br>Low risk   | 4-6<br>Moderate risk | 8-12<br>High risk | 15-25<br>Extreme risk |

**Supplementary appendix 3: Summary of the opportunities for error and high-risk errors occurring across all sites pre- and post-CPOE**

| Prescribing error                                                                                                                                                                                              | Pre-CPOE         |                  |            | Post-CPOE        |                  |            |
|----------------------------------------------------------------------------------------------------------------------------------------------------------------------------------------------------------------|------------------|------------------|------------|------------------|------------------|------------|
|                                                                                                                                                                                                                | N <sub>Opp</sub> | N <sub>Err</sub> | Error rate | N <sub>Opp</sub> | N <sub>Err</sub> | Error rate |
| Regular opiates prescribed without concurrent use of laxatives ( <i>Risk of severe constipation</i> )                                                                                                          | 486              | 55               | 11.3%      | 438              | 37               | 8.4%       |
| Benzodiazepines prescribed long-term (i.e. more than 2-4 weeks) ( <i>Risk of dependence and withdrawal reactions</i> )                                                                                         | 129              | 40               | 31.0%      | 122              | 38               | 31.1%      |
| Digoxin prescribed concomitantly with a diuretic ( <i>Risk of hypokalaemia and subsequent digoxin toxicity</i> )                                                                                               | 76               | 39               | 51.3%      | 59               | 25               | 42.4%      |
| Insulin prescribed to a patient at an inappropriate time, allowing for an administration without food (except once daily long-acting insulins) ( <i>Increased risk of hypoglycaemia</i> )                      | 104              | 28               | 26.9%      | 113              | 50               | 44.2%      |
| Citalopram prescribed concomitantly with other QT prolonging drugs ( <i>Increased risk of arrhythmias</i> )                                                                                                    | 161              | 28               | 17.4%      | 141              | 19               | 13.5%      |
| Clopidogrel prescribed to a patient concomitantly with omeprazole or esomeprazole ( <i>Antiplatelet effect of clopidogrel potentially reduced</i> )                                                            | 409              | 27               | 6.6%       | 366              | 14               | 3.8%       |
| Paracetamol prescribed at a dose of 4 g over a 24 hour to a patient under 50 kg ( <i>Risk of hepatocellular toxicity</i> )                                                                                     | 841              | 25               | 3.0%       | 863              | 29               | 3.4%       |
| Selective serotonin re-uptake inhibitor prescribed concomitantly with tramadol ( <i>Increased risk of serotonin syndrome</i> )                                                                                 | 161              | 24               | 14.9%      | 141              | 5                | 3.5%       |
| Potassium-sparing diuretic (excluding aldosterone antagonists) prescribed to a patient also receiving an ACE inhibitor or angiotensin-II receptor antagonist ( <i>Increased risk of severe hyperkalaemia</i> ) | 334              | 23               | 6.9%       | 272              | 22               | 8.1%       |
| Statin prescribed concomitantly with a macrolide antibiotic ( <i>Increased risk of myopathy</i> )                                                                                                              | 434              | 20               | 4.6%       | 406              | 6                | 1.5%       |
| ACE inhibitor or angiotensin-II receptor antagonist prescribed to a patient with a potassium level >5.0 mmol/litre ( <i>Can cause or exacerbate hyperkalaemia</i> )                                            | 334              | 19               | 5.7%       | 272              | 19               | 7.0%       |
| Benzodiazepine-like drugs (e.g. Zopiclone) prescribed long-term (i.e. more than 2-4 weeks) ( <i>Risk of dependence reactions</i> )                                                                             | 129              | 19               | 14.7%      | 122              | 8                | 6.6%       |
| Benzodiazepine or benzodiazepine-like drug prescribed long-term to a patient with depression ( <i>Risk of dependence and withdrawal reactions</i> )                                                            | 129              | 16               | 12.4%      | 122              | 5                | 4.1%       |
| Low molecular weight heparin prescribed at a dose exceeding the maximum as stated in the product literature ( <i>Risk of bleeding increased</i> )                                                              | 712              | 15               | 2.1%       | 438              | 1                | 0.2%       |
| More than one paracetamol-containing product prescribed to a patient at a time ( <i>Maximum dose exceeded</i> )                                                                                                | 841              | 14               | 1.7%       | 863              | 20               | 2.3%       |

|                                                                                                                                                                                                                                                                               |     |    |       |     |    |       |
|-------------------------------------------------------------------------------------------------------------------------------------------------------------------------------------------------------------------------------------------------------------------------------|-----|----|-------|-----|----|-------|
| Selective serotonin re-uptake inhibitor prescribed to a patient with a history of clinically significant hyponatraemia (non-iatrogenic , sodium <130 mmol/litre in the previous 2 months) ( <i>Increased risk of hyponatraemia</i> )                                          | 161 | 14 | 8.7%  | 141 | 2  | 1.4%  |
| Soluble insulin prescribed to a patient on a when required basis ( <i>Increased risk of serious episodes of hypoglycaemia and nocturnal hypoglycaemia post dose</i> )                                                                                                         | 104 | 13 | 12.5% | 113 | 16 | 14.2% |
| Benzodiazepine or benzodiazepine-like drug prescribed to a patient with COPD ( <i>Risk of respiratory depression</i> )                                                                                                                                                        | 129 | 12 | 9.3%  | 122 | 11 | 9.0%  |
| Selective serotonin re-uptake inhibitor prescribed to a patient with epilepsy ( <i>Increased risk of seizure threshold being reduced</i> )                                                                                                                                    | 161 | 11 | 6.8%  | 141 | 5  | 3.5%  |
| Low molecular weight heparin prescribed to a patient with renal impairment without dose adjustment ( <i>Increased risk of bleeding</i> )                                                                                                                                      | 712 | 10 | 1.4%  | 438 | 5  | 1.1%  |
| Prescribing of incorrect or inequivalent morphine (opiate) dose via multiple routes ( <i>Risk of toxicity</i> )                                                                                                                                                               | 486 | 10 | 2.1%  | 438 | 1  | 0.2%  |
| Selective serotonin re-uptake inhibitor prescribed concomitantly with aspirin without appropriate prophylaxis with anti-secretory drugs or mucosal protectant ( <i>Increased risk of gastrointestinal bleeding</i> )                                                          | 161 | 8  | 5.0%  | 141 | 11 | 7.8%  |
| Vancomycin prescribed intravenously over less than 60 minutes ( <i>Rapid infusion of vancomycin can cause severe reactions</i> )                                                                                                                                              | 22  | 7  | 31.8% | 16  | 4  | 25.0% |
| Clopidogrel prescribed to a patient concomitantly with a NSAID ( <i>Increased risk of bleeding</i> )                                                                                                                                                                          | 409 | 7  | 1.7%  | 366 | 2  | 0.5%  |
| Antipsychotic, other than risperidone, prescribed to a patient for the management of the behavioural and psychological symptoms of dementia ( <i>Increased risk of stroke</i> )                                                                                               | 66  | 6  | 9.1%  | 61  | 6  | 9.8%  |
| Antiplatelet prescribed to a patient with a concurrent bleeding disorder ( <i>Increased risk of bleeding</i> )                                                                                                                                                                | 409 | 6  | 1.5%  | 366 | 4  | 1.1%  |
| Domperidone prescribed at a total daily dose exceeding 30 mg/day in adults > 60 years old ( <i>Increased risk of QTc prolongation, serious ventricular arrhythmia and sudden cardiac death</i> )                                                                              | 21  | 6  | 28.6% | 9   | 0  | 0.0%  |
| Tramadol prescribed concomitantly with antiepileptics ( <i>Increased risk of seizures in patients with uncontrolled epilepsy</i> )                                                                                                                                            | 486 | 5  | 1.0%  | 438 | 4  | 0.9%  |
| Aspirin prescribed to a patient with a past medical history of peptic ulcer disease without anti-secretory drugs or mucosal protectants ( <i>Increased risk of peptic ulceration, and risk of bleeding</i> )                                                                  | 409 | 4  | 1.0%  | 366 | 4  | 1.1%  |
| Penicillin containing compound prescribed to a penicillin allergic patient without reasoning (e.g. a mild or non-allergy such as diarrhoea or vomiting entered as an allergy where the indication for penicillin is compelling) ( <i>Risk of hypersensitivity reactions</i> ) | 244 | 4  | 1.6%  | 232 | 1  | 0.4%  |
| Cephalosporin antibiotic prescribed to an older adult (except under the direction of Microbiology or for suspected meningitis) ( <i>Increased risk of antibiotic-associated infections</i> )                                                                                  | 27  | 4  | 14.8% | 7   | 0  | 0.0%  |
| Weekly dose of an oral bisphosphonate prescribed daily ( <i>Risk of hypocalcaemia</i> )                                                                                                                                                                                       | 74  | 4  | 5.4%  | 71  | 0  | 0.0%  |



|                                                                                                                                                                                                                |     |   |       |     |   |      |
|----------------------------------------------------------------------------------------------------------------------------------------------------------------------------------------------------------------|-----|---|-------|-----|---|------|
| Gentamicin prescribed to a patient with renal impairment without dose adjustment ( <i>Increased risk of toxicity</i> )                                                                                         | 46  | 3 | 6.5%  | 23  | 2 | 8.7% |
| Nitrofurantoin prescribed to a patient with eGFR < 60 ml/minute/1.73m <sup>2</sup> ( <i>Risk of peripheral neuropathy and inadequate concentration in urine</i> )                                              | 13  | 3 | 23.1% | 1   | 0 | 0.0% |
| Warfarin prescribed concomitantly with a NSAID ( <i>Increased risk of bleeding</i> )                                                                                                                           | 106 | 3 | 2.8%  | 82  | 0 | 0.0% |
| Tricyclic antidepressant prescribed to a patient with dementia ( <i>Increased risk of worsening cognitive impairment</i> )                                                                                     | 79  | 2 | 2.5%  | 56  | 4 | 7.1% |
| Macrolide antibiotic prescribed concomitantly with warfarin without appropriate dose adjustment or increased INR monitoring ( <i>Increased risk of bleeding</i> )                                              | 106 | 2 | 1.9%  | 82  | 2 | 2.4% |
| Gentamicin prescribed to an adult patient with normal renal function in a dose exceeding 7 mg/kg/day ( <i>Increased risk of toxicity</i> )                                                                     | 46  | 2 | 4.3%  | 23  | 1 | 4.3% |
| Amiodarone prescribed to a patient with abnormal thyroid function tests ( <i>Increased risk of thyroid disorders</i> )                                                                                         | 24  | 2 | 8.3%  | 19  | 0 | 0.0% |
| Digoxin prescribed at a dose >125 micrograms daily to a patient with renal impairment ( <i>Increased risk of digoxin toxicity</i> )                                                                            | 76  | 2 | 2.6%  | 59  | 0 | 0.0% |
| Metformin prescribed to a patient with eGFR < 30 mls/min/1.73m <sup>2</sup> ( <i>Increased risk of lactic acidosis</i> )                                                                                       | 115 | 2 | 1.7%  | 104 | 0 | 0.0% |
| Methotrexate prescribed to a patient with abnormal liver function tests ( <i>Risk of liver toxicity</i> )                                                                                                      | 11  | 2 | 18.2% | 11  | 0 | 0.0% |
| NSAID prescribed to a patient with a history of heart failure ( <i>Risk of exacerbation of heart failure</i> )                                                                                                 | 88  | 2 | 2.3%  | 74  | 0 | 0.0% |
| NSAID prescribed to a patient with chronic renal failure ( <i>Increased risk of deteriorating renal function</i> )                                                                                             | 88  | 2 | 2.3%  | 74  | 0 | 0.0% |
| Non-cardioselective beta-adrenoceptor blocking drug prescribed to a patient with COPD ( <i>Increased risk of bronchospasm</i> )                                                                                | 306 | 1 | 0.3%  | 336 | 2 | 0.6% |
| Antipsychotic prescribed long-term (i.e. > 1 month) to a patient with parkinsonism ( <i>Increased risk of worsening of extra-pyramidal side effects</i> )                                                      | 66  | 1 | 1.5%  | 61  | 1 | 1.6% |
| Amiodarone prescribed concomitantly with simvastatin 40 mg or above ( <i>Increased risk of myopathy</i> )                                                                                                      | 24  | 1 | 4.2%  | 19  | 0 | 0.0% |
| Brand specific prescribing of tacrolimus preparations ( <i>Brands vary in their dosing and pharmacokinetics</i> )                                                                                              | 5   | 1 | 20.0% | 8   | 0 | 0.0% |
| Diphenoxylate, loperamide, or codeine phosphate prescribed as antidiarrhoeal agents for treatment of diarrhoea of unknown cause ( <i>Increased risk of exacerbating constipation with overflow diarrhoea</i> ) | 65  | 1 | 1.5%  | 37  | 0 | 0.0% |
| Glibenclamide prescribed to an older adult with Type 2 diabetes mellitus ( <i>Increased risk of hypoglycaemia</i> )                                                                                            | 2   | 1 | 50.0% | 0   | 0 | NA   |
| Methotrexate prescribed to a patient with a clinically significant drop in white cell count or platelet count ( <i>Risk of bone marrow suppression</i> )                                                       | 11  | 1 | 9.1%  | 11  | 0 | 0.0% |

|                                                                                                                                                                                                                                                                           |     |   |       |    |   |      |
|---------------------------------------------------------------------------------------------------------------------------------------------------------------------------------------------------------------------------------------------------------------------------|-----|---|-------|----|---|------|
| Metoclopramide prescribed to a patient with parkinsonism ( <i>Risk of exacerbating parkinsonism symptoms</i> )                                                                                                                                                            | 83  | 1 | 1.2%  | 98 | 0 | 0.0% |
| Pioglitazone prescribed to a patient with heart failure ( <i>Risk of exacerbation of heart failure</i> )                                                                                                                                                                  | 5   | 1 | 20.0% | 2  | 0 | 0.0% |
| Quinolone antibiotic prescribed to a patient with epilepsy ( <i>Increased risk of seizure threshold being reduced</i> )                                                                                                                                                   | 27  | 1 | 3.7%  | 10 | 0 | 0.0% |
| Tricyclic antidepressant prescribed at the same time as a Monoamine Oxidase Inhibitor ( <i>Increased risk of serotonin syndrome</i> )                                                                                                                                     | 3   | 1 | 33.3% | 0  | 0 | NA   |
| Vancomycin prescribed intravenously to a patient with renal impairment without dose adjustment ( <i>Increased risk of toxicity</i> )                                                                                                                                      | 22  | 1 | 4.5%  | 16 | 0 | 0.0% |
| Prochlorperazine prescribed to a patient with parkinsonism ( <i>Risk of exacerbating parkinsonism symptoms</i> )                                                                                                                                                          | 15  | 0 | 0.0%  | 28 | 2 | 7.1% |
| Potassium chloride supplements continued for longer than is required (reference range 3.5-5.3 mmol/litre) ( <i>Increased risk of hyperkalaemia</i> )                                                                                                                      | 58  | 0 | 0.0%  | 55 | 1 | 1.8% |
| Warfarin prescribed to a patient with a concurrent bleeding disorder ( <i>Increased risk of bleeding</i> )                                                                                                                                                                | 106 | 0 | 0.0%  | 82 | 1 | 1.2% |
| Amphotericin B prescribed without stating the brand name and the dose in mg/kg ( <i>Risk of fatal overdose due to confusion between lipid based and non-lipid formulations</i> )                                                                                          | 0   | 0 | NA    | 0  | 0 | NA   |
| Atazanavir prescribed concomitantly with a proton-pump inhibitor ( <i>Concentration of atazanavir potentially reduced, reducing therapeutic effect</i> )                                                                                                                  | 1   | 0 | 0.0%  | 0  | 0 | NA   |
| Colestyramine prescribed to a patient at the same time as any other oral medication ( <i>Risk of poor clinical effect owing to reduced absorption of medications</i> )                                                                                                    | 1   | 0 | 0.0%  | 0  | 0 | NA   |
| Digoxin prescribed at a dose of >125 micrograms daily to a patient with heart failure who is in sinus rhythm ( <i>Increased risk of digoxin toxicity</i> )                                                                                                                | 76  | 0 | 0.0%  | 59 | 0 | 0.0% |
| Diphenoxylate, loperamide, codeine phosphate prescribed as antidiarrhoeal agents for treatment of severe infective gastroenteritis (e.g. bloody diarrhoea, high fever, or severe systemic toxicity) ( <i>Increased risk of exacerbation or protraction of infection</i> ) | 65  | 0 | 0.0%  | 35 | 0 | 0.0% |
| Gentamicin dose calculated based on actual body weight rather than ideal body weight in an obese patient (BMI > 30 kg/m <sup>2</sup> ) ( <i>Risk of excessive dosing and toxicity</i> )                                                                                   | 46  | 0 | 0.0%  | 23 | 0 | 0.0% |
| Lithium dose not adjusted or omitted in a patient with a lithium concentration above the therapeutic range (> 1.0 mmol/litre) ( <i>Risk of lithium toxicity</i> )                                                                                                         | 4   | 0 | 0.0%  | 2  | 0 | 0.0% |
| Lithium prescribed in conjunction with newly prescribed NSAIDs without dose adjustment or increased monitoring ( <i>Increased risk of toxicity</i> )                                                                                                                      | 4   | 0 | 0.0%  | 2  | 0 | 0.0% |

|                                                                                                                                                                                                                   |    |   |      |    |   |      |
|-------------------------------------------------------------------------------------------------------------------------------------------------------------------------------------------------------------------|----|---|------|----|---|------|
| Lithium therapy prescribed in conjunction with newly prescribed loop or thiazide diuretics without dose adjustment or increased monitoring ( <i>Increased risk of toxicity</i> )                                  | 4  | 0 | 0.0% | 2  | 0 | 0.0% |
| Methotrexate prescribed concomitantly with trimethoprim ( <i>Increased risk of haematological toxicity</i> )                                                                                                      | 11 | 0 | 0.0% | 11 | 0 | 0.0% |
| Nefopam prescribed concomitantly with antiepileptics ( <i>Increased risk of seizures in patients with uncontrolled epilepsy</i> )                                                                                 | 0  | 0 | NA   | 0  | 0 | NA   |
| NSAID prescribed to a patient with a history of peptic ulcer disease or gastrointestinal bleeding without anti-secretory drugs or mucosal protectants ( <i>Increased risk of peptic ulceration and bleeding</i> ) | 88 | 0 | 0.0% | 74 | 0 | 0.0% |
| Oral methotrexate prescribed to a patient with an inappropriate frequency ( <i>Increased risk of toxicity</i> )                                                                                                   | 11 | 0 | 0.0% | 11 | 0 | 0.0% |
| Orlistat prescribed at the same time of day as oral antiepileptics ( <i>Orlistat can reduce the absorption of antiepileptics, leading to loss of seizure control</i> )                                            | 0  | 0 | NA   | 0  | 0 | NA   |
| Phenytoin and enteral feeds prescribed to a patient concomitantly ( <i>Reduced absorption of phenytoin</i> )                                                                                                      | 6  | 0 | 0.0% | 10 | 0 | 0.0% |
| Quinolone prescribed to a patient who is also receiving theophylline ( <i>Possible increased risk of convulsions</i> )                                                                                            | 27 | 0 | 0.0% | 10 | 0 | 0.0% |
| Tramadol prescribed concomitantly with a Monoamine Oxidase Inhibitor ( <i>Increased risk of serotonin syndrome</i> )                                                                                              | 3  | 0 | 0.0% | 0  | 0 | NA   |
| Verapamil prescribed to a patient concomitantly with a beta-adrenoceptor blocking drug ( <i>Increased risk of adverse cardiovascular effects</i> )                                                                | 4  | 0 | 0.0% | 6  | 0 | 0.0% |
| Verapamil prescribed to a patient with NYHA Class III or IV heart failure ( <i>Risk of precipitating heart failure, exacerbating conduction disorders and causing significant deterioration</i> )                 | 4  | 0 | 0.0% | 6  | 0 | 0.0% |

N<sub>opp</sub> represents the number of error-opportunities generated, whilst N<sub>err</sub> is the number of errors that were found to have occurred. Error rates were generated by dividing the latter by the former, with

“NA” representing cases where this rate was incalculable due to a denominator of zero.

ACE Angiotensin converting enzyme; BMI Body mass index; CPOE Computerised physician order entry; #eGFR Estimated glomerula filtration rate; NSAIDs Non-steroidal anti-inflammatory drugs; NYHA New York Heart Association

**Supplementary appendix 4: Clinical decision support configured at each site for each of the 78 errors**

| Prescribing Error                                                                                                                                                                                                                                                    | Error Type                | Level of CDS |              |              |
|----------------------------------------------------------------------------------------------------------------------------------------------------------------------------------------------------------------------------------------------------------------------|---------------------------|--------------|--------------|--------------|
|                                                                                                                                                                                                                                                                      |                           | Site 1       | Site 2       | Site 3       |
| Penicillin containing compound prescribed to a penicillin allergic patient without reasoning (e.g. a mild or non-allergy such as diarrhoea or vomiting entered as an allergy where the indication for penicillin is compelling) (Risk of hypersensitivity reactions) | Allergy                   | Interruptive | Interruptive | Interruptive |
| ACE inhibitor or angiotensin-II receptor antagonist prescribed to a patient with a potassium level >5.0 mmol/litre (Can cause or exacerbate hyperkalaemia)                                                                                                           | Clinical contraindication | None         | None         | None         |
| Amiodarone prescribed to a patient with abnormal thyroid function tests (Increased risk of thyroid disorders)                                                                                                                                                        | Clinical contraindication | Interruptive | None         | None         |
| Antiplatelet prescribed to a patient with a concurrent bleeding disorder (Increased risk of bleeding)                                                                                                                                                                | Clinical contraindication | None         | None         | None         |
| Antipsychotic, other than risperidone, prescribed to a patient for the management of the behavioural and psychological symptoms of dementia (Increased risk of stroke)                                                                                               | Clinical contraindication | None         | None         | None         |
| Aspirin prescribed to a patient with a past medical history of peptic ulcer disease without anti-secretory drugs or mucosal protectants (Increased risk of peptic ulceration, and risk of bleeding)                                                                  | Clinical contraindication | None         | None         | None         |
| Benzodiazepine or benzodiazepine-like drug prescribed to a patient with chronic obstructive pulmonary disease(Risk of respiratory depression)                                                                                                                        | Clinical contraindication | None         | None         | None         |

|                                                                                                                                                                                                                                                                  |                           |              |      |      |
|------------------------------------------------------------------------------------------------------------------------------------------------------------------------------------------------------------------------------------------------------------------|---------------------------|--------------|------|------|
| Cephalosporin antibiotic prescribed to an older adult (except under the direction of Microbiology or for suspected meningitis) (Increased risk of antibiotic-associated infections)                                                                              | Clinical contraindication | None         | None | None |
| Diphenoxylate, loperamide, codeine phosphate prescribed as antidiarrhoeal agents for treatment of severe infective gastroenteritis (e.g. bloody diarrhoea, high fever, or severe systemic toxicity) (Increased risk of exacerbation or protraction of infection) | Clinical contraindication | None         | None | None |
| Glibenclamide prescribed to an older adult with Type 2 diabetes mellitus (Increased risk of hypoglycaemia)                                                                                                                                                       | Clinical contraindication | None         | None | None |
| Metformin prescribed to a patient with eGFR < 30 ml/min/1.73m <sup>2</sup> (Increased risk of lactic acidosis)                                                                                                                                                   | Clinical contraindication | None         | None | None |
| Methotrexate prescribed to a patient with a clinically significant drop in white cell count or platelet count (Risk of bone marrow suppression)                                                                                                                  | Clinical contraindication | Passive      | None | None |
| Methotrexate prescribed to a patient with abnormal liver function tests (Risk of liver toxicity)                                                                                                                                                                 | Clinical contraindication | None         | None | None |
| Metoclopramide prescribed to a patient with parkinsonism (Risk of exacerbating parkinsonism symptoms)                                                                                                                                                            | Clinical contraindication | None         | None | None |
| Nitrofurantoin prescribed to a patient with eGFR < 60 ml/minute/1.73m <sup>2</sup> (Risk of peripheral neuropathy and inadequate concentration in urine) †                                                                                                       | Clinical contraindication | None         | None | None |
| Non-cardioselective beta-adrenoceptor blocking drug prescribed to a patient with COPD (Increased risk of bronchospasm)                                                                                                                                           | Clinical contraindication | Interruptive | None | None |

|                                                                                                                                                                                                                             |                           |      |      |      |
|-----------------------------------------------------------------------------------------------------------------------------------------------------------------------------------------------------------------------------|---------------------------|------|------|------|
| NSAID prescribed to a patient with a history of heart failure (Risk of exacerbation of heart failure)                                                                                                                       | Clinical contraindication | None | None | None |
| NSAID prescribed to a patient with a history of peptic ulcer disease or gastrointestinal bleeding without anti-secretory drugs or mucosal protectants (Increased risk of peptic ulceration and bleeding)                    | Clinical contraindication | None | None | None |
| NSAID prescribed to a patient with chronic renal failure (Increased risk of deteriorating renal function)                                                                                                                   | Clinical contraindication | None | None | None |
| Pioglitazone prescribed to a patient with heart failure (Risk of exacerbation of heart failure) †                                                                                                                           | Clinical contraindication | None | None | None |
| Potassium chloride supplements continued for longer than is required (reference range 3.5–5.3 mmol/litre) (Increased risk of hyperkalaemia)                                                                                 | Clinical contraindication | None | None | None |
| Prochlorperazine prescribed to a patient with parkinsonism (Risk of exacerbating parkinsonism symptoms)                                                                                                                     | Clinical contraindication | None | None | None |
| Quinolone antibiotic prescribed to a patient with epilepsy (Increased risk of seizure threshold being reduced)                                                                                                              | Clinical contraindication | None | None | None |
| Selective serotonin re-uptake inhibitor prescribed to a patient with a history of clinically significant hyponatraemia (non-iatrogenic , sodium <130 mmol/litre in the previous 2 months) (Increased risk of hyponatraemia) | Clinical contraindication | None | None | None |
| Selective serotonin re-uptake inhibitor prescribed to a patient with epilepsy (Increased risk of seizure threshold being reduced)                                                                                           | Clinical contraindication | None | None | None |
| Tricyclic antidepressant prescribed to a patient with dementia (Increased risk of worsening cognitive impairment)                                                                                                           | Clinical contraindication | None | None | None |

|                                                                                                                                                                                           |                           |              |              |      |
|-------------------------------------------------------------------------------------------------------------------------------------------------------------------------------------------|---------------------------|--------------|--------------|------|
| Vancomycin prescribed intravenously to a patient with renal impairment without dose adjustment (Increased risk of toxicity)                                                               | Clinical contraindication | None         | None         | None |
| Verapamil prescribed to a patient with NYHA Class III or IV heart failure (Risk of precipitating heart failure, exacerbating conduction disorders and causing significant deterioration)  | Clinical contraindication | Interruptive | None         | None |
| Warfarin prescribed to a patient with a concurrent bleeding disorder (Increased risk of bleeding)                                                                                         | Clinical contraindication | Interruptive | None         | None |
| Digoxin prescribed at a dose >125 micrograms daily to a patient with renal impairment (Increased risk of digoxin toxicity)                                                                | Dosing                    | Interruptive | None         | None |
| Digoxin prescribed at a dose of >125 micrograms daily to a patient with heart failure who is in sinus rhythm (Increased risk of digoxin toxicity)                                         | Dosing                    | None         | None         | None |
| Domperidone prescribed at a total daily dose exceeding 30 mg/day in adults > 60 years old (Increased risk of QTc prolongation, serious ventricular arrhythmia and sudden cardiac death) † | Dosing                    | Passive      | None         | None |
| Gentamicin dose calculated based on actual body weight rather than ideal body weight in an obese patient (BMI > 30 kg/m <sup>2</sup> ) (Risk of excessive dosing and toxicity)            | Dosing                    | None         | Interruptive | None |
| Gentamicin prescribed to a patient with renal impairment without dose adjustment (Increased risk of toxicity)                                                                             | Dosing                    | None         | None         | None |
| Gentamicin prescribed to an adult patient with normal renal function in a dose exceeding 7 mg/kg/day (Increased risk of toxicity)                                                         | Dosing                    | None         | None         | None |

|                                                                                                                                                                         |                       |              |              |              |
|-------------------------------------------------------------------------------------------------------------------------------------------------------------------------|-----------------------|--------------|--------------|--------------|
| Lithium dose not adjusted or omitted in a patient with a lithium concentration above the therapeutic range (> 1.0 mmol/litre) (Risk of lithium toxicity)                | Dosing                | None         | None         | None         |
| Low molecular weight heparin prescribed at a dose exceeding the maximum as stated in the product literature (Risk of bleeding increased)                                | Dosing                | Interruptive | None         | None         |
| Low molecular weight heparin prescribed to a patient with renal impairment without dose adjustment (Increased risk of bleeding)                                         | Dosing                | Interruptive | None         | None         |
| Paracetamol prescribed at a dose of 4 g over a 24 hour to a patient under 50 kg (Risk of hepatocellular toxicity) <sup>†</sup>                                          | Dosing                | Interruptive | None         | None         |
| Amphotericin B prescribed without stating the brand name and the dose in mg/kg (Risk of fatal overdose due to confusion between lipid based and non-lipid formulations) | Drug name             | Interruptive | Interruptive | Interruptive |
| Brand specific prescribing of tacrolimus preparations (Brands vary in their dosing and pharmacokinetics)                                                                | Drug name             | Interruptive | Interruptive | Interruptive |
| Amiodarone prescribed concomitantly with simvastatin 40 mg or above (Increased risk of myopathy)                                                                        | Drug-drug interaction | None         | Interruptive | Interruptive |
| Atazanavir prescribed concomitantly with a proton-pump inhibitor (Concentration of atazanavir potentially reduced, reducing therapeutic effect)                         | Drug-drug interaction | None         | Interruptive | Interruptive |
| Citalopram prescribed concomitantly with other QT prolonging drugs (Increased risk of arrhythmias) †                                                                    | Drug-drug interaction | None         | Interruptive | Interruptive |
| Clopidogrel prescribed to a patient concomitantly with a NSAID (Increased risk of bleeding)                                                                             | Drug-drug interaction | None         | Interruptive | Interruptive |



|                                                                                                                                                                           |                       |         |              |              |
|---------------------------------------------------------------------------------------------------------------------------------------------------------------------------|-----------------------|---------|--------------|--------------|
| Clopidogrel prescribed to a patient concomitantly with omeprazole or esomeprazole (Antiplatelet effect of clopidogrel potentially reduced)†                               | Drug-drug interaction | None    | Interruptive | Interruptive |
| Colestyramine prescribed to a patient at the same time as any other oral medication (Risk of poor clinical effect owing to reduced absorption of medications) †           | Drug-drug interaction | Passive | None         | None         |
| Digoxin prescribed concomitantly with a diuretic (Risk of hypokalaemia and subsequent digoxin toxicity)                                                                   | Drug-drug interaction | None    | Interruptive | Interruptive |
| Lithium prescribed in conjunction with newly prescribed NSAIDs without dose adjustment or increased monitoring (Increased risk of toxicity)†                              | Drug-drug interaction | None    | Interruptive | Interruptive |
| Lithium therapy prescribed in conjunction with newly prescribed loop or thiazide diuretics without dose adjustment or increased monitoring (Increased risk of toxicity) † | Drug-drug interaction | None    | Interruptive | Interruptive |
| Macrolide antibiotic prescribed concomitantly with warfarin without appropriate dose adjustment or increased INR monitoring (Increased risk of bleeding)                  | Drug-drug interaction | None    | Interruptive | Interruptive |
| Methotrexate prescribed concomitantly with trimethoprim (Increased risk of haematological toxicity)                                                                       | Drug-drug interaction | None    | Interruptive | Interruptive |
| Nefopam prescribed concomitantly with antiepileptics (Increased risk of seizures in patients with uncontrolled epilepsy) †                                                | Drug-drug interaction | None    | Interruptive | Interruptive |
| Orlistat prescribed at the same time of day as oral antiepileptics (Orlistat can reduce the absorption of antiepileptics, leading to loss of seizure control)             | Drug-drug interaction | None    | None         | None         |

|                                                                                                                                                                                                             |                       |      |              |              |
|-------------------------------------------------------------------------------------------------------------------------------------------------------------------------------------------------------------|-----------------------|------|--------------|--------------|
| Potassium-sparing diuretic (excluding aldosterone antagonists) prescribed to a patient also receiving an ACE inhibitor or angiotensin-II receptor antagonist (Increased risk of severe hyperkalaemia)       | Drug-drug interaction | None | Interruptive | Interruptive |
| Quinolone prescribed to a patient who is also receiving theophylline (Possible increased risk of convulsions )                                                                                              | Drug-drug interaction | None | Interruptive | Interruptive |
| Selective serotonin re-uptake inhibitor prescribed concomitantly with aspirin without appropriate prophylaxis with anti-secretory drugs or mucosal protectant (Increased risk of gastrointestinal bleeding) | Drug-drug interaction | None | Interruptive | Interruptive |
| Selective serotonin re-uptake inhibitor prescribed concomitantly with tramadol (Increased risk of serotonin syndrome)                                                                                       | Drug-drug interaction | None | Interruptive | Interruptive |
| Statin prescribed concomitantly with a macrolide antibiotic (Increased risk of myopathy)                                                                                                                    | Drug-drug interaction | None | Interruptive | Interruptive |
| Tramadol prescribed concomitantly with a Monoamine Oxidase Inhibitor (Increased risk of serotonin syndrome)                                                                                                 | Drug-drug interaction | None | Interruptive | Interruptive |
| Tramadol prescribed concomitantly with antiepileptics (Increased risk of seizures in patients with uncontrolled epilepsy) †                                                                                 | Drug-drug interaction | None | Interruptive | Interruptive |
| Tricyclic antidepressant prescribed at the same time as a Monoamine Oxidase Inhibitor (Increased risk of serotonin syndrome)                                                                                | Drug-drug interaction | None | Interruptive | Interruptive |
| Verapamil prescribed to a patient concomitantly with a beta-adrenoceptor blocking drug (Increased risk of adverse cardiovascular effects)                                                                   | Drug-drug interaction | None | Interruptive | Interruptive |

|                                                                                                                                                                |                       |              |              |              |
|----------------------------------------------------------------------------------------------------------------------------------------------------------------|-----------------------|--------------|--------------|--------------|
| Warfarin prescribed concomitantly with a NSAID (Increased risk of bleeding)                                                                                    | Drug-drug interaction | None         | Interruptive | Interruptive |
| Phenytoin and enteral feeds prescribed to a patient concomitantly (Reduced absorption of phenytoin)                                                            | Drug-food interaction | None         | None         | None         |
| More than one paracetamol-containing product prescribed to a patient at a time (Maximum dose exceeded)                                                         | Duplicate therapy     | None         | None         | Interruptive |
| Antipsychotic prescribed long-term (i.e. > 1 month) to a patient with parkinsonism (Increased risk of worsening of extra-pyramidal side effects)               | Duration              | None         | None         | None         |
| Benzodiazepine or benzodiazepine-like drug prescribed long-term to a patient with depression (Risk of dependence and withdrawal reactions)                     | Duration              | None         | None         | None         |
| Benzodiazepine-like drugs (e.g. Zopiclone) prescribed long-term (i.e. more than 2–4 weeks) (Risk of dependence reactions)                                      | Duration              | None         | None         | None         |
| Benzodiazepines prescribed long-term (i.e. more than 2–4 weeks) (Risk of dependence and withdrawal reactions)                                                  | Duration              | None         | None         | None         |
| Oral methotrexate prescribed to a patient with an inappropriate frequency (Increased risk of toxicity)                                                         | Frequency             | Interruptive | Interruptive | None         |
| Soluble insulin prescribed to a patient on a when required basis (Increased risk of serious episodes of hypoglycaemia and nocturnal hypoglycaemia post dose) † | Frequency             | Interruptive | None         | None         |
| Weekly dose of an oral bisphosphonate prescribed daily (Risk of hypocalcaemia) †                                                                               | Frequency             | Interruptive | Interruptive | None         |

|                                                                                                                                                                                                       |                                    |         |      |              |
|-------------------------------------------------------------------------------------------------------------------------------------------------------------------------------------------------------|------------------------------------|---------|------|--------------|
| Diphenoxylate, loperamide, or codeine phosphate prescribed as antidiarrhoeal agents for treatment of diarrhoea of unknown cause (Increased risk of exacerbating constipation with overflow diarrhoea) | Indication                         | None    | None | None         |
| Vancomycin prescribed intravenously over less than 60 minutes (Rapid infusion of vancomycin can cause severe reactions)                                                                               | Intravenous rate                   | Passive | None | Interruptive |
| Regular opiates prescribed without concurrent use of laxatives (Risk of severe constipation)‡                                                                                                         | Omission of prophylactic treatment | None    | None | None         |
| Prescribing of incorrect or inequivalent morphine (opiate) dose via multiple routes. (Risk of toxicity)‡                                                                                              | Route                              | None    | None | Passive      |
| Insulin prescribed to a patient at an inappropriate time, allowing for an administration without food (except once daily long-acting insulins) (Increased risk of hypoglycaemia)                      | Timing of dose                     | Passive | None | None         |

ACE Angiotensin converting enzyme; BMI Body mass index; eGFR Estimated glomerula filtration rate; NSAIDs Non-steroidal anti-inflammatory drugs; NYHA New York Heart Association

**Supplementary appendix 5: Errors occurring pre-implementation and post-implementation considering the level of decision support**

| Site         | Level of CDS | N <sub>Ind</sub> | Pre-CPOE         |                  |            | Post-CPOE        |                  |            | Relative Risk<br>(95% CI) | P-value          |
|--------------|--------------|------------------|------------------|------------------|------------|------------------|------------------|------------|---------------------------|------------------|
|              |              |                  | N <sub>Opp</sub> | N <sub>Err</sub> | Error rate | N <sub>Opp</sub> | N <sub>Err</sub> | Error rate |                           |                  |
| <b>1</b>     | None         | 59               | 2742             | 117              | 4.3%       | 1924             | 57               | 3.0%       | 0.69 (0.50 – 0.96)        | <b>0.023</b>     |
|              | Passive      | 5                | 57               | 19               | 33.3%      | 40               | 15               | 37.5%      | 1.13 (0.61 – 2.02)        | 0.673            |
|              | Interruptive | 14               | 1068             | 31               | 2.9%       | 670              | 2                | 0.3%       | 0.10 (0.02 – 0.44)        | <b>&lt;0.001</b> |
| <b>2</b>     | None         | 51               | 3177             | 106              | 3.3%       | 3207             | 160              | 5.0%       | 1.50 (1.18 – 1.97)        | <b>0.001</b>     |
|              | Passive      | 0                | 0                | -                | -          | 0                | -                | -          | -                         | -                |
|              | Interruptive | 27               | 1336             | 73               | 5.5%       | 1320             | 40               | 3.0%       | 0.55 (0.37 – 0.82)        | <b>0.002</b>     |
| <b>3</b>     | None         | 51               | 1699             | 122              | 7.2%       | 1532             | 59               | 3.9%       | 0.54 (0.39 – 0.73)        | <b>&lt;0.001</b> |
|              | Passive      | 1                | 133              | 8                | 6.0%       | 129              | 0                | 0.0%       | 0.00 (0.00 – 0.68)        | <b>0.007</b>     |
|              | Interruptive | 26               | 1100             | 86               | 7.8%       | 1004             | 57               | 5.7%       | 0.73 (0.52 – 1.02)        | 0.056            |
| <b>Total</b> | None         | 161              | 7618             | 345              | 4.5%       | 6663             | 276              | 4.1%       | 0.91 (0.78 – 1.07)        | 0.267            |
|              | Passive      | 6                | 190              | 27               | 14.2%      | 169              | 15               | 8.9%       | 0.62 (0.33 – 1.18)        | 0.139            |
|              | Interruptive | 67               | 3504             | 190              | 5.4%       | 2994             | 99               | 3.3%       | 0.61 (0.48 – 0.78)        | <b>&lt;0.001</b> |

N<sub>Ind</sub> represents the number of IMPACT pre-defined errors in each group, N<sub>Opp</sub> is the number of error-opportunities generated, and N<sub>Err</sub> is the number of errors that were found to have occurred. p-Values are from Fisher's exact tests, with bold values significant at p<0.05.

CDS Clinical decision support; CPOE Computerised physician order entry; CI Confidence interval
